# Supplementary material for: Self-assembled 3D architectures of blade-shaped hierarchical hollow microspheres from cristobalite nanosheets with exposed (101) facets
Source: Royal Society of Chemistry journal article supplement (doi:10.1039/c7ce01242j), 2017-01-01
Supplement: c7ce01242j1.pdf [file c7ce01242j1.pdf]

### Self-assembled 3D architectures of blade-shaped hierarchical hollow microspheres from cristobalite nanosheets with dominant (101) facets

Haifeng Wang<sup>a</sup>, Bo Hu<sup>c</sup>, Wenjing Song<sup>\*b</sup>, Lin Quan<sup>a</sup> and Xingmao Jiang<sup>\*b</sup>

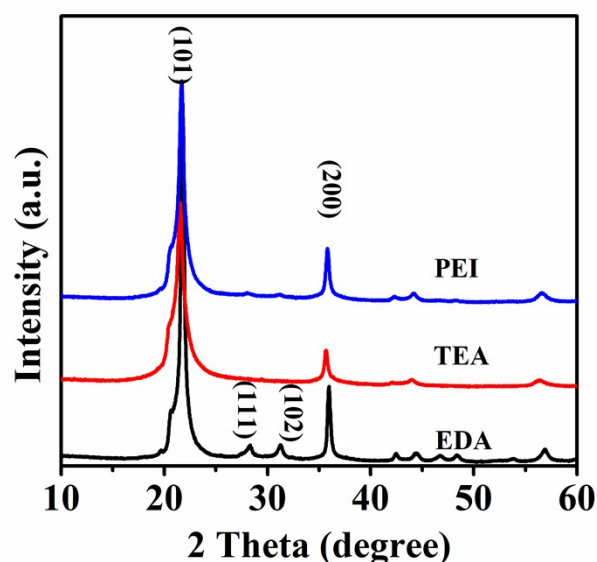

Fig. S1 XRD images of samples prepared using three different organic bases under hydrothermal conditions, pH value of the PEI, TEA and EDA are 11.8, 11.3 and 14.0.

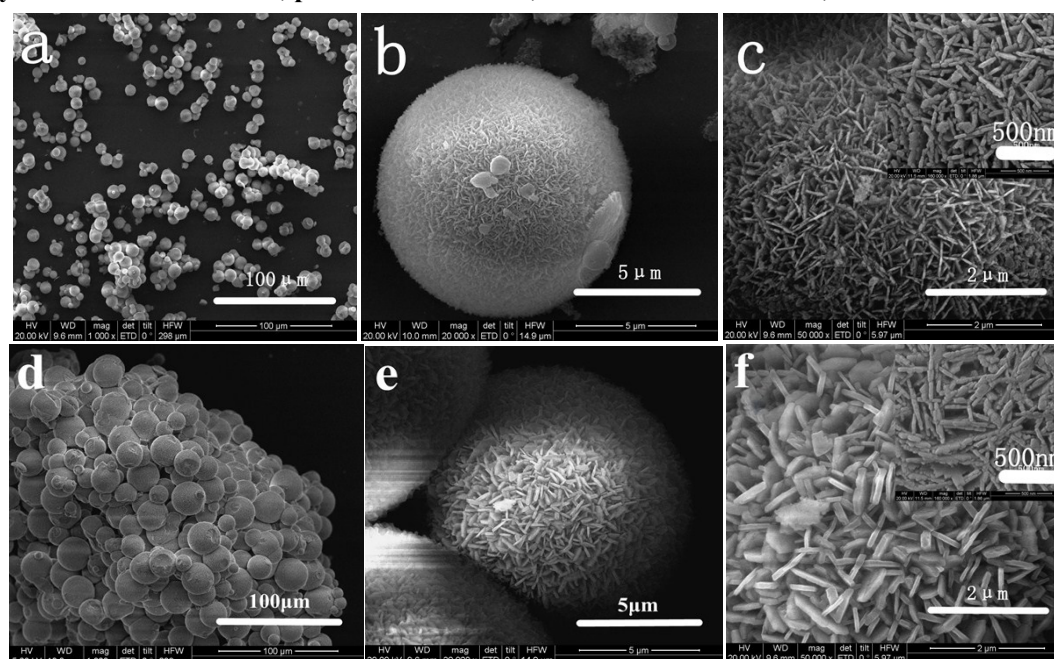

Fig. S2 SEM images of samples prepared using three different organic bases under hydrothermal conditions

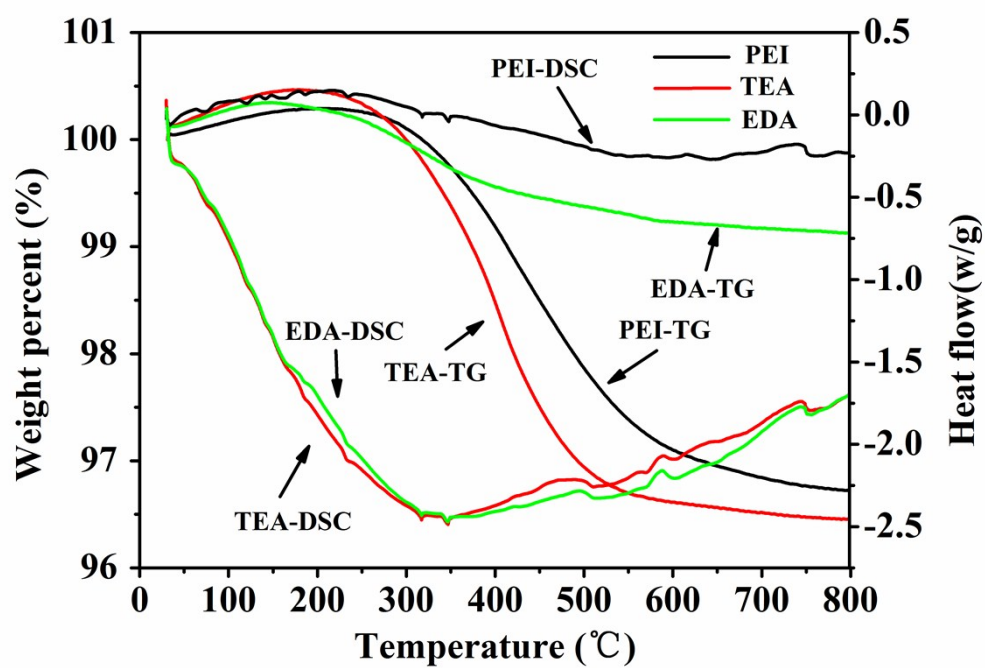

Fig. S3 TG/DSC analysis for cristobalite silica particles. The analysis was carried out in air with a temperature increase rate of 10 °C/min.

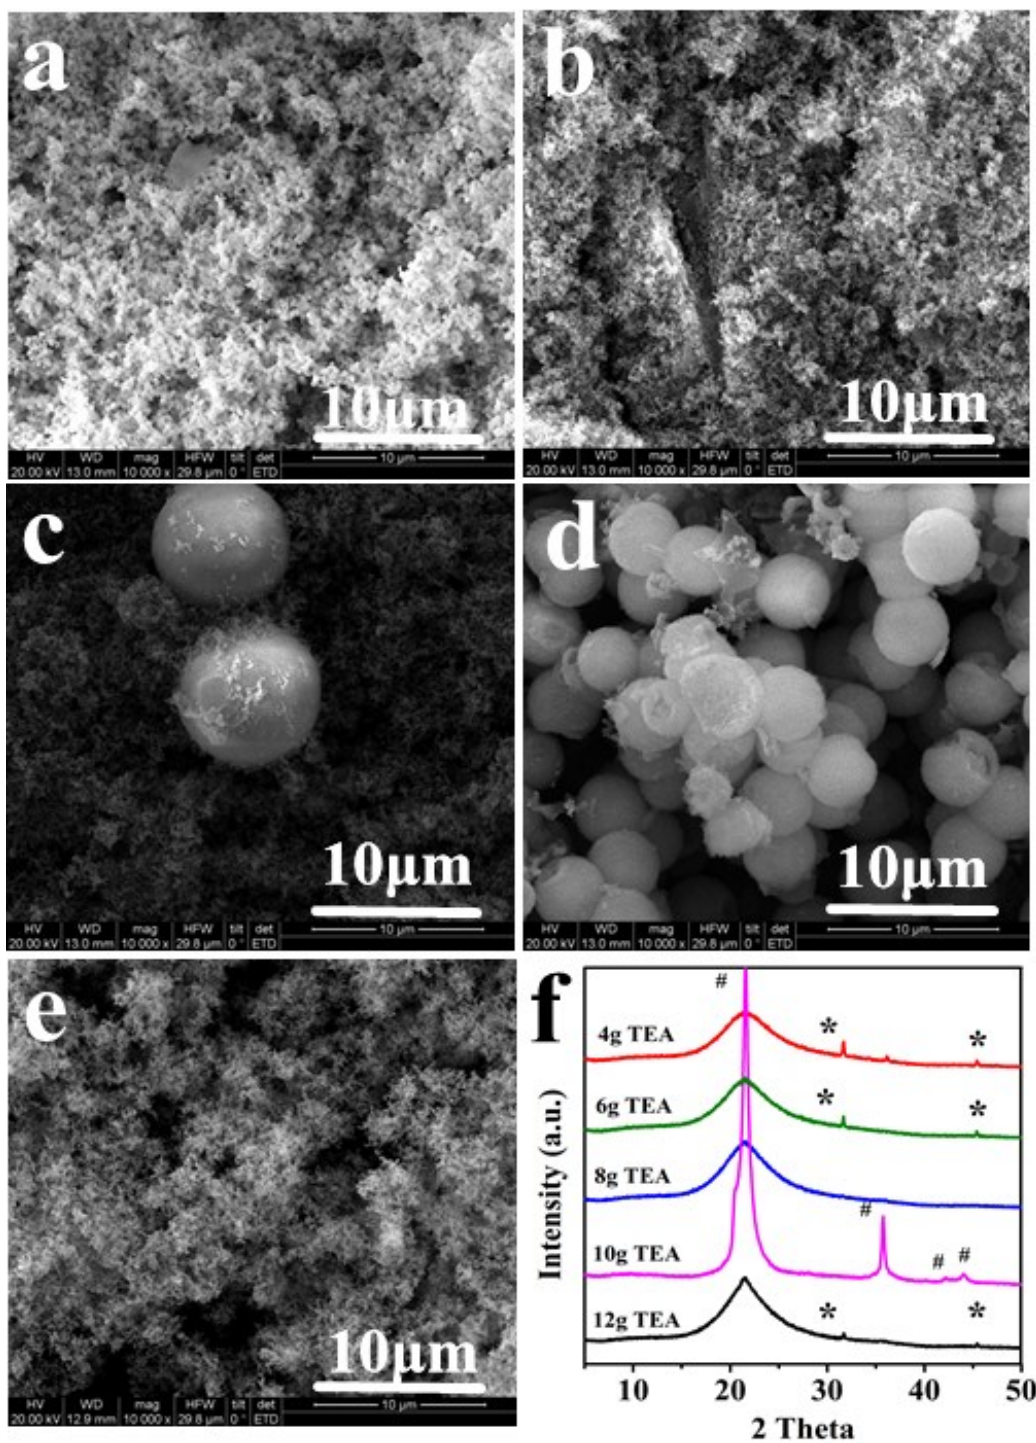

Fig. S4 SEM images of samples prepared under different amount of TEA. (a):4 g (b): 6 g (c): 8 g (d): 10 g (e): 12 g and (f): XRD patterns of sample (a)-(e). And the pH value of (a)-(e) are 9.7, 10.32, 11.10 11.30 and 11.54, respectively.

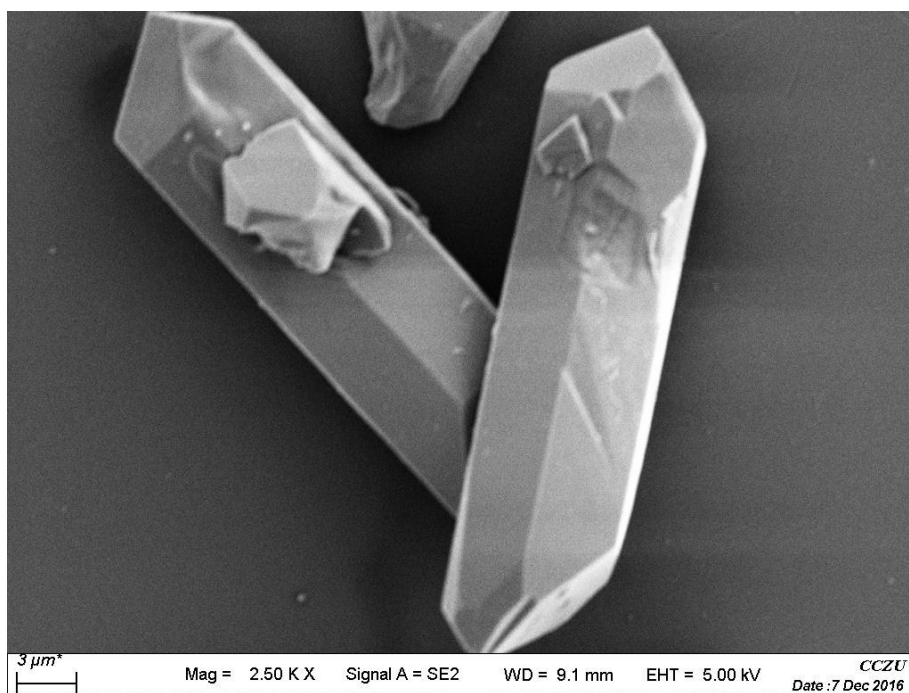

**Fig. S5 Morphology of samples under the condition of using inorganic sodium hydroxide**
